# Supplementary material for: Antimicrobial surfaces grafted random copolymers with REDV peptide beneficial for endothelialization
Source: Royal Society of Chemistry journal article supplement (doi:10.1039/c5tb01155h), 2015-01-01
Supplement: c5tb01155h1.pdf [file c5tb01155h1.pdf]

## Supplements

### **Antimicrobial surfaces grafted random copolymers with REDV peptide beneficial for endothelialization**

Jing Yang,<sup>a||</sup> Musammir Khan,<sup>a||</sup> Li Zhang,<sup>b</sup> Xiangkui Ren,<sup>a,b</sup> Jintang Guo,<sup>a,b</sup> Yakai Feng,<sup>\*a,b,c,d</sup> Shuping Wei,<sup>e</sup> Wencheng Zhang<sup>\*e</sup>

<sup>a</sup> School of Chemical Engineering and Technology, Tianjin University, Tianjin 300072, China

<sup>b</sup> Tianjin University Helmholtz-Zentrum Geesthacht, Joint Laboratory for Biomaterials and Regenerative Medicine, Weijin Road 92, 300072 Tianjin, China

<sup>c</sup> Key Laboratory of Systems Bioengineering, Ministry of Education, Tianjin University, Tianjin 300072, China

<sup>d</sup> Collaborative Innovation Center of Chemical Science and Chemical Engineering (Tianjin), Weijin Road 92, Tianjin 300072, China

<sup>e</sup> Department of Physiology and Pathophysiology, Logistics University of Chinese People's Armed Police Force, Tianjin 300162, China

\*To whom corresponding should be addressed:

E-mail: yakai.feng@tju.edu.cn (Feng, Y. K.)

Note: || These authors have equal contribution to this work.

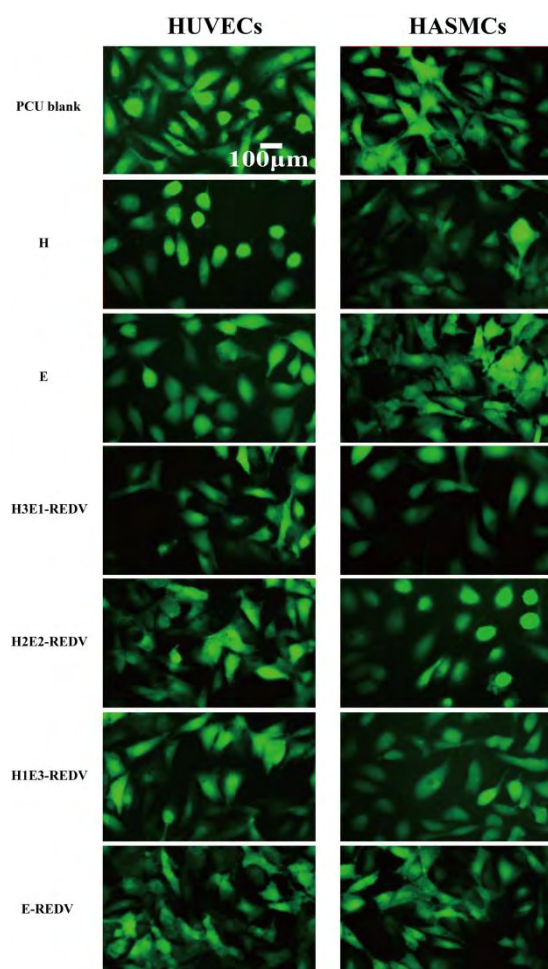

Fig. S1 The fluorescence micrographs (magnification  $\times 40$ ) of morphologies of HUVECs and HASMCs on difference PCU-films after 3-day culture.
